# Supplementary material
Source: ML conference proceedings conference paper supplement (https://openreview.net/forum?id=8L83ZbFDjk)

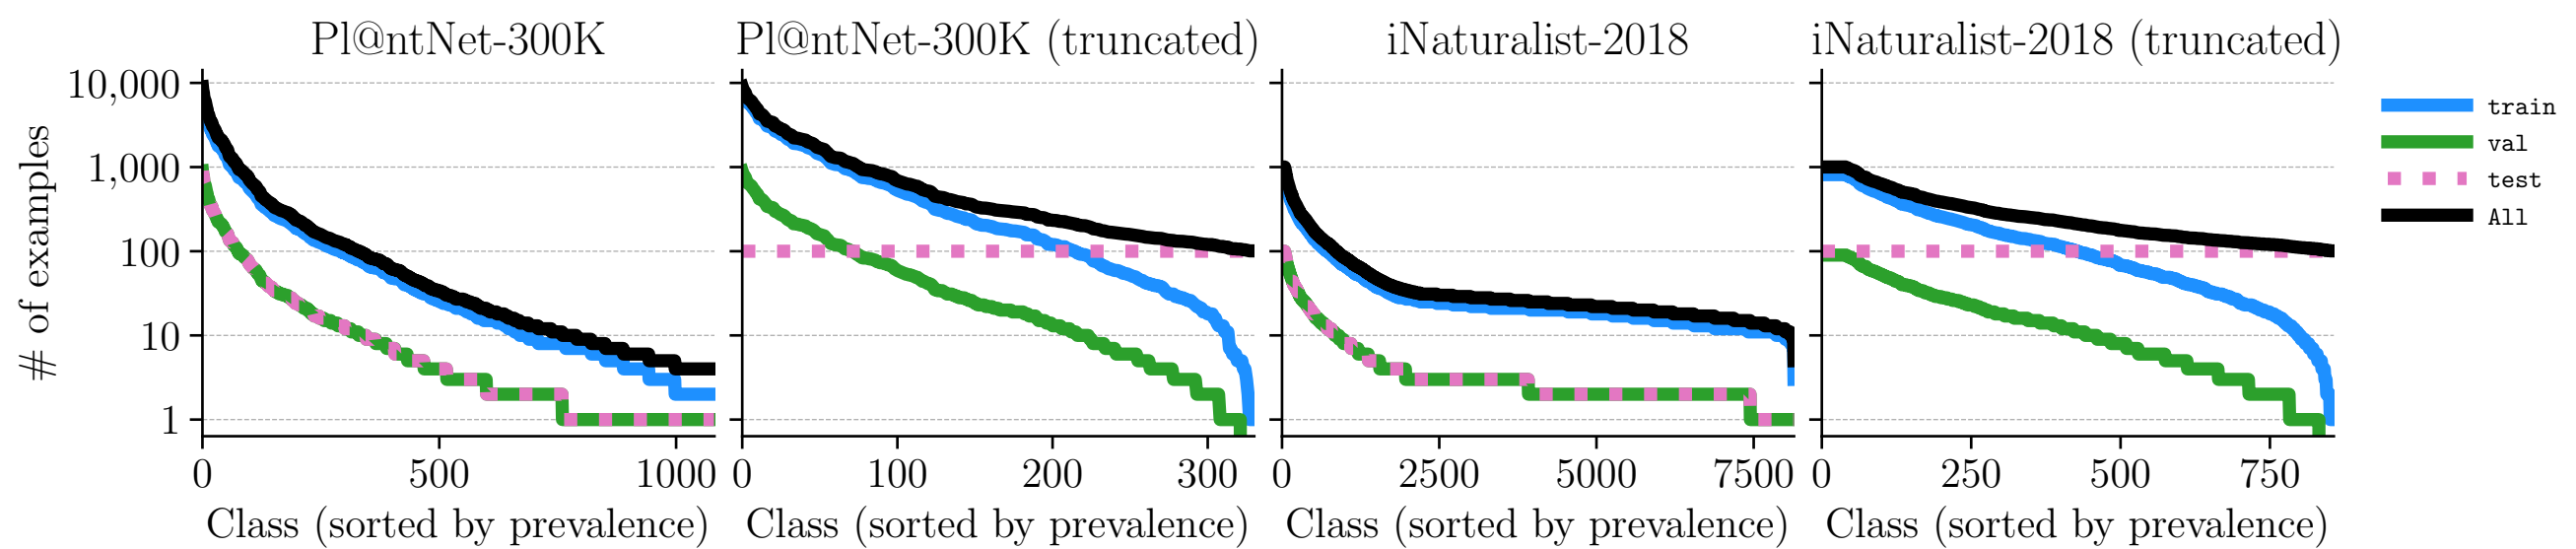

Supplement: supplementary_material [file all_class_distributions.pdf › 13936_Conformal_Prediction_for_Supplementary Material(4)/notebooks/figs/all_class_distributions.pdf]
